# Supplementary material
Source: PubMed Central journal article supplement (PMC6078207)
Supplement: NIHMS979900-supplement-1.pdf [file NIHMS979900-supplement-1.pdf]

## Appendix 1

### Symbols and their definitions

- $x$  : Instantaneous configuration (positions, box vectors)
- $N_{\text{H}_2\text{O}}$  : Number of water molecules
- $N_{\text{Na}^+}$  : Number of cations
- $N_{\text{Cl}^-}$  : Number of anions
- $N_{\text{NaCl}}$  : Number of salt pairs beyond minimal neutralizing ions; equal to  $\min\{N_{\text{Na}^+}, N_{\text{Cl}^-}\}$
- $N$  : Sum of total number of waters and ions in the system
- $\theta$  : Vector species labels with  $N$  elements that identifies which molecules are waters and which are ions;  $\theta_i = 0$  indicates water,  $\theta_i = +1$  indicates monovalent cations, and  $\theta_i = -1$  indicates monovalent anions
- $z$  : total charge number of the macromolecules in the simulation
- $n(\theta)$  : total charge number of the ions in the simulation

$$n(\theta) = \sum_{i=1}^N \theta_i \quad (26)$$

- $U(x, \theta)$  : Potential energy for a system with configuration  $x$  and water/ion identities  $\theta$ , units of energy
- $p$  : External pressure, units of energy  $\cdot$  length<sup>-3</sup>
- $V$  : Instantaneous box volume, units of length<sup>3</sup>
- $T$  : Absolute temperature, units of temperature
- $k_B$  : Boltzmann constant, units of energy  $\cdot$  temperature<sup>-1</sup>
- $\beta$  : Inverse temperature ( $\equiv 1/k_B T$ ), units of energy<sup>-1</sup>
- $I$  : Ionic strength, where instantaneous ionic strength for configuration  $x$  is given by

$$I(x, \theta) \equiv \frac{1}{2} \frac{1}{V(x)} \left( z^2 + \sum_{i=1}^N \theta_i^2 \right) \quad (27)$$

Note that ionic strength includes minimal neutralizing counterions in the sum.

- $\Delta\mu$  : Chemical potential difference for extracting a NaCl molecule from bulk water and depositing two water molecules to bulk water; an abbreviation of  $\Delta\mu_{2\text{H}_2\text{O}-\text{NaCl}}$
- $f(N_{\text{NaCl}})$  : Free energy to replace  $2N_{\text{H}_2\text{O}}$  water molecules with  $N_{\text{NaCl}}$  salt pairs in bulk water; an abbreviation of  $f(N_{\text{NaCl}}, N, p, T)$ .
- $\Delta f(N_{\text{NaCl}})$  : Free energy to add one more salt pair and remove two additional water molecules in a box of water than contains  $N_{\text{NaCl}}$  salt pairs already; equal to  $f(N_{\text{NaCl}} + 1) - f(N_{\text{NaCl}})$ ; an abbreviation of  $\Delta f(N_{\text{NaCl}}, N, p, T)$
- $Z(N_{\text{NaCl}}, N, p, T)$  : Isothermal-isobaric configurational partition function

$$Z(N_{\text{NaCl}}, N, p, T) \equiv \int dx e^{-\beta[U(x; N_{\text{NaCl}}) + pV(x)]} \quad (28)$$

- $\Xi(\Delta\mu, N, p, T)$  : Semigrand-isothermal-isobaric configurational partition function expressed as a sum over all  $\theta$

$$\Xi(\Delta\mu, N, p, T) = \sum_{\theta} \delta(n(\theta), -z) \int dx e^{-\beta[U(x, \theta) + pV(x) + \Delta\mu N_{\text{NaCl}}(\theta)]}, \quad (29)$$

and expressed as a sum of number of ions and water molecules

1109  
 1110  
 1111  
 1112  
 1113  
 1114  
 1115  
 1116  
 1117  
 1118  
 1119  
 1120  
 1121  
 1122  
 1123  
 1124  
 1125  
 1126  
 1127  
 1128  
 1129  
 1130  
 1131

$$\Xi(\Delta\mu, N, p, T) \equiv \sum_{N_{\text{NaCl}}=0}^{N/2} \frac{N!}{N_{\text{Na}^+}! N_{\text{Cl}^-}! N_{\text{H}_2\text{O}}!} Z(N_{\text{NaCl}}, N, p, T) e^{\beta\Delta\mu N_{\text{NaCl}}}, \quad (30)$$

where  $N_{\text{NaCl}} = \min\{N_{\text{Na}^+}, N_{\text{Cl}^-}\}$  and  $N = N_{\text{Na}^+} + N_{\text{Cl}^-} + N_{\text{H}_2\text{O}}$ . The upper bound of the summation—valid when  $z = 0$  and  $N$  is even—is required as two water molecules are removed for every  $N_{\text{NaCl}}$ .

- $\pi(x, \theta; N, p, T, \mu)$ : Semigrand-isothermal-isobaric probability density with charge neutrality constraint

$$\pi(x, \theta; \Delta\mu, N, p, T) = \frac{1}{\Xi(\Delta\mu, N, p, T)} \delta(n(\theta), -z) e^{-\beta[U(x, \theta) + pV(x) + \Delta\mu N_{\text{NaCl}}(\theta)]}, \quad (31)$$

where the dependence of  $\pi(x, \theta; \Delta\mu, N, p, T)$  on  $z$  is omitted for brevity

- $\langle A \rangle_{\Delta\mu, N, p, T}$ : Expectation of  $A(x, \theta)$  in  $(\Delta\mu, N, p, T)$  ensemble

$$\langle A \rangle_{\Delta\mu, N, p, T} \equiv \frac{1}{\Xi(\Delta\mu, N, p, T)} \sum_{\theta} \delta(n(\theta), -z) \int dx A(x, \theta) e^{-\beta[U(x, \theta) + pV(x) + \Delta\mu N_{\text{NaCl}}(\theta)]} \quad (32)$$

- $\langle A \rangle_{N_{\text{NaCl}}, N, p, T}$ : Expectation of  $A(x)$  in  $(N_{\text{NaCl}}, N, p, T)$  ensemble

$$\langle A \rangle_{N_{\text{NaCl}}, N, p, T} \equiv \frac{1}{Z(N_{\text{NaCl}}, N, p, T)} \int dx A(x) e^{-\beta[U(x; N_{\text{NaCl}}) + pV(x)]} \quad (33)$$

## 1132 Appendix 2

### 1133 Salt concentration in the thermodynamic limit

1134 The purpose of this section is to derive an expression that relates the chemical potential to the  
 1135 salt concentration in a macroscopic saline reservoir (equation 19). This relationship is used in  
 1136 the calibration of our osmostat. The derivation will proceed by first, justifying the macroscopic  
 1137 concentration as the thermodynamic limit of the mean concentration, and second, rewriting the  
 1138 resultant expression in a manner that is amenable to computation.

1139 The mean concentration in the thermodynamic limit

1140 Following the definition of the concentration given in equation 20, the mean salt concentration in the  
 1141 semigrand ensemble considered here is given by

$$1142 \langle c \rangle_{\Delta\mu, N, p, T} = \left\langle \frac{N_{\text{NaCl}}(\theta)}{V(x)} \right\rangle_{\Delta\mu, N, p, T}. \quad (34)$$

1143 We seek an approximation to this expression that it is appropriate for large, macroscopic amounts  
 1144 of liquid saline. For brevity, all expectation values with respect to the thermodynamic ensemble  
 1145  $(\Delta\mu, N, p, T)$  in this section will henceforth be abbreviated as  $\langle \cdot \rangle$ .

1146 The concentration is a function of two correlated random variables, the number of salt pairs  
 1147  $N_{\text{NaCl}}(\theta)$  and the total volume  $V(x)$ . A common way to approximate the expectation value, or mean, of  
 a function of random variables is to perform a Taylor expansion about the mean of the arguments.  
 The Taylor expansion (up to the second-order) of the function  $g(a, b)$  about the means  $\langle a \rangle$  and  $\langle b \rangle$ , is

$$g(a, b) = g(\langle a \rangle, \langle b \rangle) + \frac{\partial g}{\partial a} \Big|_{\langle a \rangle, \langle b \rangle} (a - \langle a \rangle) + \frac{\partial g}{\partial b} \Big|_{\langle a \rangle, \langle b \rangle} (b - \langle b \rangle) + \frac{1}{2} \frac{\partial^2 g}{\partial a^2} \Big|_{\langle a \rangle, \langle b \rangle} (a - \langle a \rangle)^2 \\ + \frac{1}{2} \frac{\partial^2 g}{\partial b^2} \Big|_{\langle a \rangle, \langle b \rangle} (b - \langle b \rangle)^2 + \frac{\partial^2 g}{\partial a \partial b} \Big|_{\langle a \rangle, \langle b \rangle} (a - \langle a \rangle)(b - \langle b \rangle) + \dots \quad (35)$$

This expansion is particularly useful because the first order terms of the expanded mean  $\langle g(a, b) \rangle$  are zero i.e.  $\langle a - \langle a \rangle \rangle = 0$  and  $\langle b - \langle b \rangle \rangle = 0$ . Hence, truncating the expansion to the second order leaves us with the approximation

$$\langle g(a, b) \rangle \approx g(\langle a \rangle, \langle b \rangle) + \frac{1}{2} \frac{\partial^2 g}{\partial a^2} \Big|_{\langle a \rangle, \langle b \rangle} \langle (a - \langle a \rangle)^2 \rangle + \frac{1}{2} \frac{\partial^2 g}{\partial b^2} \Big|_{\langle a \rangle, \langle b \rangle} \langle (b - \langle b \rangle)^2 \rangle \\ + \frac{\partial^2 g}{\partial a \partial b} \Big|_{\langle a \rangle, \langle b \rangle} \langle (a - \langle a \rangle)(b - \langle b \rangle) \rangle \\ = g(\langle a \rangle, \langle b \rangle) + \frac{1}{2} \frac{\partial^2 g}{\partial a^2} \Big|_{\langle a \rangle, \langle b \rangle} \text{Var}(a) + \frac{1}{2} \frac{\partial^2 g}{\partial b^2} \Big|_{\langle a \rangle, \langle b \rangle} \text{Var}(b) + \frac{\partial^2 g}{\partial a \partial b} \Big|_{\langle a \rangle, \langle b \rangle} \text{Cov}(a, b), \quad (36)$$

where  $\text{Var}(a)$  and  $\text{Cov}(a, b)$  denote the variance and covariance, respectively. Returning to the salt concentration, we relate  $c$  to the above with  $g(N_{\text{NaCl}}, V) = N_{\text{NaCl}}/V$ , and evaluate the partial derivatives to find that

$$\langle c \rangle \approx \frac{\langle N_{\text{NaCl}} \rangle}{\langle V \rangle} + \frac{\langle N_{\text{NaCl}} \rangle}{\langle V \rangle^3} \text{Var}(V) - \frac{1}{\langle V \rangle^2} \text{Cov}(V, N_{\text{NaCl}}). \quad (37)$$

The leading term  $\langle N_{\text{NaCl}} \rangle / \langle V \rangle$  is the macroscopic expression that we seek. Thus, we require that the variance and covariance terms vanish in the thermodynamic limit. To show that they indeed do, we exploit the useful correspondence between partial derivatives and covariance in statistical thermodynamics. First, note that

$$\text{Var}(V) = (k_B T)^2 \frac{\partial^2 \ln(\Xi)}{\partial p^2} \\ = -k_B T \frac{\partial \langle V \rangle}{\partial p}, \quad (38)$$

where  $\Xi \equiv \Xi(\Delta\mu, N, p, T)$  and is defined in equation 7. Also, note that

$$\begin{aligned} \text{Cov}(V, N_{\text{NaCl}}) &= (k_B T)^2 \frac{\partial^2 \ln(\Xi)}{\partial p \partial \Delta\mu} \\ &= k_B T \frac{\partial \langle V \rangle}{\partial \Delta\mu}. \end{aligned} \quad (39)$$

Second, we make use of the isothermal compressibility

$$\kappa_T \equiv -\frac{1}{\langle V \rangle} \frac{\partial \langle V \rangle}{\partial p}, \quad (40)$$

and introduce the isothermal susceptibility of the volume with respect to the chemical potential

$$\chi_T \equiv \frac{1}{\langle V \rangle} \frac{\partial \langle V \rangle}{\partial \Delta\mu}, \quad (41)$$

The susceptibilities  $\kappa_T$  and  $\chi_T$  are bulk properties that measure the relative amount the volume of a system responds to changes in pressure and chemical potential, respectively. They are intensive quantities, such that they do not scale with the size of the system. These allow us to re-write the approximation of the mean concentration (equation 37) as

$$\langle c \rangle \approx \frac{\langle N_{\text{NaCl}} \rangle}{\langle V \rangle} - \frac{1}{k_B T} \frac{\langle N_{\text{NaCl}} \rangle}{\langle V \rangle^2} \kappa_p - \frac{1}{k_B T} \frac{1}{\langle V \rangle} \chi_T. \quad (42)$$

To proceed, note that in the second term, both  $N_{\text{NaCl}}$  and  $\langle V \rangle$  are extensive, and rise in proportion to the total number of molecules in the system  $N$ . Thus, approximating the mean concentration as  $\langle N_{\text{NaCl}} \rangle / \langle V \rangle$  incurs an error that is  $\mathcal{O}(\langle V \rangle^{-1})$ , which tends to zero in the thermodynamic limit. We therefore define the macroscopic concentration of a saline reservoir as

$$\langle \hat{c} \rangle \equiv \frac{\langle N_{\text{NaCl}} \rangle}{\langle V \rangle}. \quad (43)$$

We require the macroscopic concentration to be amenable to computational analysis

While the expression for the macroscopic concentration above does not appear immediately useful, we now show how  $\langle \hat{c} \rangle$  can be calculated for wide range of applied chemical potentials by pre-calculating the free energies to insert salt into a system,  $f(N_{\text{NaCl}})$  ( $\equiv f(N_{\text{NaCl}}, \Delta\mu, N, p, T)$ ), and the average volume as a function of the number of salt pairs,  $\langle V \rangle_{N_{\text{NaCl}}}$  ( $\equiv \langle V \rangle_{N_{\text{NaCl}}, N, p, T}$ ).

To begin, it is useful to expand the definition of  $\langle N_{\text{NaCl}} \rangle$  given by equation 17 into

$$\langle N_{\text{NaCl}} \rangle = \frac{\sum_{N_{\text{NaCl}}=0} N_{\text{NaCl}} e^{-f(N_{\text{NaCl}}) + \beta \Delta\mu N_{\text{NaCl}}}}{\sum_{N_{\text{NaCl}}=0} e^{-f(N_{\text{NaCl}}) + \beta \Delta\mu N_{\text{NaCl}}}}. \quad (44)$$

Next, we derive an expression for  $\langle V \rangle$  that will cancel with the denominator of equation 44 when evaluating  $\langle \hat{c} \rangle$ . Using the representation of the semigrand density given by equation 8, the mean

volume is given by

$$\begin{aligned}
 \langle V \rangle &= \frac{\sum_{N_{\text{NaCl}}=0} \int dx V(x) e^{-\beta(U(x; N_{\text{NaCl}}) + pV(x) + \Delta\mu N_{\text{NaCl}}(\theta))}}{\sum_{N_{\text{NaCl}}=0} e^{-f(N_{\text{NaCl}}) + \beta\Delta\mu N_{\text{NaCl}}}} \\
 &= \frac{\sum_{N_{\text{NaCl}}=0} e^{\beta\Delta\mu N_{\text{NaCl}}} \int dx V(x) e^{-\beta(U(x; N_{\text{NaCl}}) + pV(x))}}{\sum_{N_{\text{NaCl}}=0} e^{-f(N_{\text{NaCl}}) + \beta\Delta\mu N_{\text{NaCl}}}} \\
 &= \frac{\sum_{N_{\text{NaCl}}=0} e^{\beta\Delta\mu N_{\text{NaCl}}} \int dx V(x) e^{-\beta(U(x; N_{\text{NaCl}}) + pV(x))} \cdot \int dx' e^{-\beta(U(x'; N_{\text{NaCl}}) + pV(x'))}}{\sum_{N_{\text{NaCl}}=0} e^{-f(N_{\text{NaCl}}) + \beta\Delta\mu N_{\text{NaCl}}} \cdot \int dx' e^{-\beta(U(x'; N_{\text{NaCl}}) + pV(x'))}} \\
 &= \frac{\sum_{N_{\text{NaCl}}=0} e^{\beta\Delta\mu N_{\text{NaCl}}} \langle V \rangle_{N_{\text{NaCl}}} \cdot e^{-f(N_{\text{NaCl}})}}{\sum_{N_{\text{NaCl}}=0} e^{-f(N_{\text{NaCl}}) + \beta\Delta\mu N_{\text{NaCl}}}} \\
 &= \frac{\sum_{N_{\text{NaCl}}=0} \langle V \rangle_{N_{\text{NaCl}}} e^{-f(N_{\text{NaCl}}) + \beta\Delta\mu N_{\text{NaCl}}}}{\sum_{N_{\text{NaCl}}=0} e^{-f(N_{\text{NaCl}}) + \beta\Delta\mu N_{\text{NaCl}}}}, \tag{45}
 \end{aligned}$$

where the third and fourth line exploit the definition of the ensemble average for a fixed  $N_{\text{NaCl}}$ . Inserting the expressions for the average number of salt pairs (equation 44) and the average volume (equation 45) into the macroscopic concentration (equation 43), we arrive at

$$\langle \hat{c} \rangle = \frac{\sum_{N_{\text{NaCl}}=0} N_{\text{NaCl}} e^{-f(N_{\text{NaCl}}) + \beta\Delta\mu N_{\text{NaCl}}}}{\sum_{N_{\text{NaCl}}=0} \langle V \rangle_{N_{\text{NaCl}}} e^{-f(N_{\text{NaCl}}) + \beta\Delta\mu N_{\text{NaCl}}}},$$

which is the same as equation 19 from the main text. Pertinently, the denominators in equations 44 and 45 have canceled, which greatly simplifies the evaluation of the macroscopic concentration for a given  $\Delta\mu$ .

## The magnitude of salt fluctuations

The concentration of salt fluctuates in osmostat simulations. This section briefly outlines how one would expect the magnitude of salt fluctuations to vary with the size of the system based on statistical mechanical principles. By differentiating equation 17, one can show that the variance of the number of salt pairs  $N_{\text{NaCl}}$  is proportional to the gradient of  $\langle N_{\text{NaCl}} \rangle$  with respect to the chemical potential  $\Delta\mu$ , specifically

$$\text{Var}(N_{\text{NaCl}}) = k_B T \frac{\partial \langle N_{\text{NaCl}} \rangle}{\partial \Delta\mu}. \tag{46}$$

By dividing both sides by  $\langle N_{\text{NaCl}} \rangle$ , i.e.

$$\frac{1}{\langle N_{\text{NaCl}} \rangle} \text{Var}(N_{\text{NaCl}}) = \frac{1}{\langle N_{\text{NaCl}} \rangle} k_B T \frac{\partial \langle N_{\text{NaCl}} \rangle}{\partial \Delta\mu}, \tag{47}$$

reveals that  $\frac{1}{\langle N_{\text{NaCl}} \rangle} \text{Var}(N_{\text{NaCl}})$  is proportional to the *relative* change in the mean of  $N_{\text{NaCl}}$  in response to altering the chemical potential. As the right-hand-side of the above equation is an intensive quantity,  $\frac{1}{\langle N_{\text{NaCl}} \rangle} \text{Var}(N_{\text{NaCl}})$  is also an intensive, implying that

$$\text{Var}(N_{\text{NaCl}}) \propto N_{\text{NaCl}}. \tag{48}$$

Therefore, the scale of the fluctuations in salt amount, as measured by the standard deviation, grows as  $\langle N_{\text{NaCl}} \rangle^{1/2}$ .

In contrast to the amount of salt, the size of the fluctuations of salt concentration *decreases* with the size of aqueous systems. Water is a highly incompressible fluid, such that small changes in pressure have a very small effect on the volume of aqueous systems. From equations 38 and 40, a low isothermal compressibility implies that the variance of the volume is small with respect to the mean volume (i.e. the relative variance). Assuming that the relative variance of the volume is smaller

1245  
1246  
1247  
1248  
1249  
1250  
1251  
1252  
1253  
1254  
1255  
1256  
1257

than the relative variance of the number of salt pairs, one can use the same approach as that of equation 35 to show that

$$\text{Var}(c) = \text{Var}\left(\frac{N_{\text{NaCl}}}{V}\right) \quad (49)$$

$$\approx \frac{1}{\langle V \rangle^2} \text{Var}(N_{\text{NaCl}}) \quad (50)$$

Using the fact that, for bulk-like water,  $\langle V \rangle \propto \langle N_{\text{H}_2\text{O}} \rangle \propto \langle N_{\text{NaCl}} \rangle$  along with equation 48, we arrive at  $\text{Var}(c) \sim \langle N_{\text{NaCl}} \rangle^{-1}$  for systems with large amounts of water. Thus, the standard deviation of the salt concentration scales like  $\langle N_{\text{H}_2\text{O}} \rangle^{-1/2}$  or  $\langle N_{\text{NaCl}} \rangle^{-1/2}$  for a fixed chemical potential.

## 1258 Appendix 3

### 1259 Algorithmic implementation of the osmostat

1260 This section describes the Metropolis-Hastings procedure from Saltswap [0.52] used to insert and  
 1261 delete salt. Insertion and deletion moves were enhanced with NCMC<sup>32</sup>. To describe its implemen-  
 1262 tation of NCMC within SaltSwap, a more compressed notation is used compared to the original  
 1263 publication. For a more general and detailed exposition on NCMC, we refer readers to the original  
 1264 manuscript.

1265 The osmostat move begins with the random choice of whether to insert or delete salt. The protocol  
 1266 is denoted  $\Lambda \in \{ \Lambda_{\text{insert}}, \Lambda_{\text{delete}} \}$ , and the time reversed protocol is denoted  $\bar{\Lambda}$ , where  $\bar{\Lambda}_{\text{insert}} = \Lambda_{\text{delete}}$   
 1267 and  $\bar{\Lambda}_{\text{delete}} = \Lambda_{\text{insert}}$ . The probability to insert or delete a salt pair,  $P(\Lambda | N_{\text{NaCl}})$ , depends on the number  
 1268 of salt molecules,  $N_{\text{NaCl}}$ , in the system in the following way:

$$1270 P(\Lambda_{\text{insert}} | N_{\text{NaCl}}) = \begin{cases} 1 & \text{if } N_{\text{NaCl}} = 0; \\ 1/2 & \text{if } 0 < N_{\text{NaCl}} < N_{\text{NaCl,max}}; \\ 0 & \text{if } N_{\text{NaCl}} = N_{\text{NaCl,max}}; \end{cases} \quad (51)$$

$$1273 P(\Lambda_{\text{delete}} | N_{\text{NaCl}}) = \begin{cases} 0 & \text{if } N_{\text{NaCl}} = 0; \\ 1/2 & \text{if } 0 < N_{\text{NaCl}} < N_{\text{NaCl,max}}; \\ 1 & \text{if } N_{\text{NaCl}} = N_{\text{NaCl,max}}; \end{cases} \quad (52)$$

1274 where for all simulations except the SAMS calibration simulations,  $N_{\text{NaCl,max}} = \frac{1}{2}(N - (N \bmod 2))$  was  
 1275 chosen as two water molecules are required for the insertion of a  $\text{Na}^+$  and  $\text{Cl}^-$  pair. In the SAMS  
 1276 calibration simulations,  $N_{\text{NaCl,max}}$  was set to twenty. The particular choices of  $P(\Lambda_{\text{delete}} | N_{\text{NaCl}})$  and  
 1277  $P(\Lambda_{\text{insert}} | N_{\text{NaCl}})$  ensure that insertions are always attempted when there is no salt in the system, and  
 1278 deletions are always attempted when the number of salt pairs has reached maximum capacity.

1282 For the insertion of salt, any two water molecules could be selected for transformation into  $\text{Na}^+$   
 1283 and  $\text{Cl}^-$ . Similarly, for the removal of salt, any  $\text{Na}^+$  ion and  $\text{Cl}^-$  ion could be selected for transformation  
 1284 into two water molecules. Formally, let  $S(N)$  denote the set  $\{1, 2, \dots, N\}$ , i.e. the set of indices for all  
 1285 water molecules and ions. For salt insertion, the index of candidate  $\text{Na}^+$  ion was a random uniform  
 1286 sample from the set  $\{i \in S(N) : \theta_i = 0\}$  and the index of the  $\text{Cl}^-$  ion was a random uniform sample  
 1287 from the set  $\{j \in S(N) : \theta_j = 0, i \neq j\}$ . For salt removal, indices were selected randomly and  
 1288 uniformly from the sets  $\{i \in S(N) : \theta_i = +1\}$  and  $\{j \in S(N) : \theta_j = -1\}$ . As indices were chosen  
 1289 with equal probability within each set of possible candidates, the ratio of selection probabilities for  
 1290 molecule indices for forward and reverse protocols are given by

$$1292 \frac{P(i, j | \Lambda_{\text{insert}})}{P(i, j | \Lambda_{\text{delete}})} = \frac{N_{\text{H}_2\text{O}}(N_{\text{H}_2\text{O}} - 1)}{(N_{\text{Na}^+} + 1)(N_{\text{Cl}^-} + 1)}, \quad (53)$$

1295 and

$$1296 \frac{P(i, j | \Lambda_{\text{delete}})}{P(i, j | \Lambda_{\text{insert}})} = \frac{N_{\text{Na}^+} N_{\text{Cl}^-}}{(N_{\text{H}_2\text{O}} + 1)(N_{\text{H}_2\text{O}} + 2)} \quad (54)$$

1298 Following the choice of protocol and pair of molecules that would be transmuted, NCMC was  
 1299 used to enhance the efficiency of the insertion or deletion attempt. This implementation of NCMC  
 1300 consists of a fixed series of *perturbation* and *propagation* kernels over a fixed alchemical path. For  
 1301 both insertion and deletion moves, the alchemical path is a linear interpolation the nonbonded  
 1302 parameters of the water model and the ions. This particular alchemical path ensured that charge  
 1303 neutrality was maintained throughout the NCMC procedure.

1304 The alchemical path is broken up into  $T$  segments that are uniformly spaced with respect to  
 1305 the nonbonded parameters. At state  $t$ , the configuration of the system will be denoted as  $x_t$  and the  
 1306 values of the nonbonded parameters for molecules  $i$  and  $j$  will be denoted as  $\lambda_t^{ij}$ . A single NCMC *step*  
 1307 corresponds to the application of the perturbation kernel followed by a the propagation kernel. When  
 1308 in state  $t$ , the perturbation kernel updates the nonbonded parameters  $(x_t, \lambda_t^{ij}) \rightarrow (x_t, \lambda_{t+1}^{ij})$ , and the  
 1309 propagation kernel updates the configuration  $(x_t, \lambda_{t+1}^{ij}) \rightarrow (x_{t+1}, \lambda_{t+1}^{ij})$ . Each propagation kernel consists  
 1310 of  $K$  steps of Langevin dynamics using the parameters described in Simulation Details. A propagation  
 1311 kernel is also applied to the system before the first perturbation kernel to ensure the time symmetry  
 1312 of the protocol. The instantaneous change in the potential energy that results from the application  
 1313 of the perturbation kernel is recorded for each NCMC step and summed to produce the total work  
 1314 performed on the system by the protocol:

$$1316 \quad W^{ij}(X_T, \Lambda) = \sum_{t=1}^T U(x_t, \lambda_{t+1}^{ij}) - U(x_t, \lambda_t^{ij}), \quad (55)$$

1317 where the nonequilibrium trajectory  $X_T \equiv (x_0, x_1, \dots, x_T)$ . The difference between the protocol work  
 1318 and applied chemical potential  $\Delta\mu$ , along with the move proposal probabilities, determines whether a  
 1319 move is accepted or rejected. For the insertion of salt  $\Delta\mu(\Lambda_{\text{insert}}) = 2\mu_{\text{H}_2\text{O}} - \mu_{\text{NaCl}}$ , and for the deletion  
 1320 of salt  $\Delta\mu(\Lambda_{\text{delete}}) = 2\mu_{\text{NaCl}} - \mu_{\text{H}_2\text{O}}$ . Attempts are accepted with the following probability

$$1322 \quad A^{ij}(X_T, \Lambda) = \min \left\{ 1, \frac{P(i, j|\tilde{\Lambda})P(\tilde{\Lambda}|\tilde{N}_{\text{NaCl}})}{P(i, j|\Lambda)P(\Lambda|N_{\text{NaCl}})} \exp(-\beta W^{ij}(X_T, \Lambda) + \beta \Delta\mu(\Lambda)) \right\}. \quad (56)$$

1323 To preserve pathwise detailed balance, velocities were reversed upon acceptance. If a move is  
 1324 accepted,  $\theta_i$  and  $\theta_j$  are updated to reflect the new molecule identities.

## 1328 Pseudo-code for the NCMC osmostat with molecular dynamics

1329 This section contains the pseudo-code of the production osmostat simulations.

### 1330 Begin algorithm

1331 Choose a macroscopic salt concentration  $\hat{c}$ .  
 1332 Infer the chemical potential  $\Delta\mu$  by inverting equation 19.  
 1333 Initialize position and velocity  $(x_0, v_0)$ , state vector  $\theta_0$ , and maximum number of iterations  $M$ .

1334 **for**  $i \in \{1, 2, \dots, M\}$  **do**

1335 **Sample conformations**

1336 Perform 4 ps of Langevin integration with a fixed amount of salt:

1337  $(x_i^*, v_i^*) \leftarrow \text{Integrate}((x_{i-1}, v_{i-1}), 4 \text{ ps})$ .

1338 **Sample salt concentration**

1339 Randomly select whether to add or remove salt as well as which molecules will be transmuted.

1340 Define the trial state vector as  $\theta^*$ .

1341 Define initial and final nonbonded parameters:  $(q_{\text{initial}}, \sigma_{\text{initial}}, \epsilon_{\text{initial}})$  and  $(q_{\text{final}}, \sigma_{\text{final}}, \epsilon_{\text{final}})$ .

1342 **procedure** NCMC( $(q_{\text{initial}}, \sigma_{\text{initial}}, \epsilon_{\text{initial}}), (q_{\text{final}}, \sigma_{\text{final}}, \epsilon_{\text{final}}), (x_i^*, v_i^*), \theta^*$ )

1343 Initialize variables, including protocol work  $W$ :

1344  $W^0 \leftarrow 0$

1345  $(q^0, \sigma^0, \epsilon^0) \leftarrow (q_{\text{initial}}, \sigma_{\text{initial}}, \epsilon_{\text{initial}})$

1346  $(x_i^0, v_i^0) \leftarrow \text{Integrate}((x_i^*, v_i^*), 20 \text{ fs})$

1347 **for**  $k \in \{1, 2, \dots, 1000\}$  **do**

1348 Linear interpolation of the nonbonded parameters:

1349  $f^k = k/1000$

1350 **for all** atoms in the molecule **do**

1351



```
1352      $q^k \leftarrow (1 - f^k)q_{\text{initial}} + f^k q_{\text{final}}$ 
1353      $\sigma^k \leftarrow (1 - f^k)\sigma_{\text{initial}} + f^k \sigma_{\text{final}}$ 
1354      $\epsilon^k \leftarrow (1 - f^k)\epsilon_{\text{initial}} + f^k \epsilon_{\text{final}}$ 
1355     end for
1356     Update the protocol work:
1357      $W^k \leftarrow W^{k-1} + U(x_i^{k-1}; q^k, \sigma^k, \epsilon^k) - U(x_i^{k-1}; q^{k-1}, \sigma^{k-1}, \epsilon^{k-1})$ 
1358     Propagate the system:
1359      $(x_i^k, v_i^k) \leftarrow \text{Integrate}((x_i^{k-1}, v_i^{k-1}), 20 \text{ fs})$ 
1360     end for
1361     Accept or reject using acceptance criterion  $A(W^k, \Delta\mu, \theta^*)$ 
1362     if Accept move then
1363         Keep final positions and state vector but reverse velocities:
1364          $(x_i, v_i) \leftarrow (x_i^k, -v_i^k)$ 
1365          $\theta_i \leftarrow \theta^*$ 
1366     else
1367         Return positions, velocities and the state vector to after equilibrium sampling:
1368          $(x_i, v_i) \leftarrow (x_i^*, v_i^*)$ 
1369          $\theta_i \leftarrow \theta_{i-1}$ 
1370     end if
1371     end procedure
1372     end for
1373     End algorithm
```

## 1374 Appendix 4

### 1375 **Validation: Ideal Mixing with the osmostat**

1376 In the Results section, Figure 4 *top left* indicates that the chemical potential has been properly  
 1377 calibrated, and Figure 6 shows that the osmostat produces samples that are concordant with physical-  
 1378 chemical intuition. In this section, we apply our osmostat to sample ideal mixing to provide further  
 1379 validation of the SaltSwap code base. Ideal mixing can be simulated with our osmostat by ensuring  
 1380 that salt insertion and deletion accrue no protocol work. This is implemented by using the same  
 1381 forcefield parameters for Na<sup>+</sup> and Cl<sup>-</sup> as the water model. As our osmostat also gives the ions the  
 1382 same mass as water, the “ions” sampled over in this section are identical to water except for their  
 1383 labeling.

1384 To validate the sampling of the osmostat, we require an analytical relationship between the  
 1385 chemical potential  $\Delta\mu$  and the numbers of salt  $N_{\text{NaCl}}$  and water molecules  $N_{\text{H}_2\text{O}}$ . The chemical  
 1386 potential used in our osmostat is the difference between the chemical potential of water multiplied  
 1387 by two and Na<sup>+</sup> and Cl<sup>-</sup>:

$$1388 \Delta\mu = 2\mu_{\text{H}_2\text{O}} - \mu_{\text{Na}^+} - \mu_{\text{Cl}^-}. \quad (57)$$

1390 In order to relate  $\Delta\mu$  to  $N_{\text{NaCl}}$  and  $N_{\text{H}_2\text{O}}$ , we will first consider a solution of water and ions in the  
 1391  $(N, p, T)$  ensemble with fixed particle identities, and then relate the result to the  $(\Delta\mu, N, p, T)$  ensemble.  
 1392 For this fixed identity solution, let  $N = N_{\text{H}_2\text{O}} + N_{\text{Na}^+} + N_{\text{Cl}^-}$  and  $N_{\text{Na}^+} = N_{\text{Cl}^-}$ . In the  $(N, p, T)$  ensemble,  
 1393 the chemical potential for a species  $s$  can be expressed as

$$1394 \mu(N, p, T) = \mu_s^o - kT \ln(x_s \gamma_s(N, p, T)), \quad (58)$$

1396 where  $\mu_s^o$  is the chemical potential of  $s$  in some reference state,  $x_s$  is the mole fraction of  $s$ , and  
 1397  $\gamma_s(N, p, T)$  is the activity coefficient of  $s$ . In general, the chemical potential is also dependent on the  
 1398 composition of the system. When Na<sup>+</sup> and Cl<sup>-</sup> have the same forcefield parameters and mass as  
 1399 water (i.e they are physically identical), the reference state and activity coefficients must be the same.  
 1400 So using equation 58 and 57 we have

$$1402 \begin{aligned} \Delta\mu(N, p, T) &= 2kT \ln(x_{\text{H}_2\text{O}}) - kT \ln(x_{\text{Na}^+}) - kT \ln(x_{\text{Cl}^-}). \\ &= 2kT \ln(x_{\text{H}_2\text{O}}) - 2kT \ln(x_{\text{NaCl}}) \\ &= 2kT \ln\left(\frac{N_{\text{H}_2\text{O}}}{N_{\text{NaCl}}}\right) \end{aligned} \quad (59)$$

1406 where the second line follows from the fact that there are equal numbers of Na<sup>+</sup> and Cl<sup>-</sup> ions. In the  
 1407 semigrand canonical  $(\Delta\mu, N, p, T)$  ensemble that is sampled by our osmostat, the chemical potential  
 1408  $\Delta\mu$  is a controlled by the user. As this conjugate to the number of salt pairs, equation 59 will apply to  
 1409 the averages  $\langle N_{\text{NaCl}} \rangle_{\Delta\mu, N, p, T}$  and  $\langle N_{\text{H}_2\text{O}} \rangle_{\Delta\mu, N, p, T}$ , so that we have

$$1411 \frac{\langle N_{\text{NaCl}} \rangle_{\Delta\mu, N, p, T}}{\langle N_{\text{H}_2\text{O}} \rangle_{\Delta\mu, N, p, T}} = e^{-\frac{1}{2}\beta\Delta\mu}. \quad (60)$$

1413 To test whether our osmostat correctly samples the average salt to water ratio given in equation 60,  
 1414 ideal mixing simulations were performed using SaltSwap on a small box of TIP3P water containing five  
 1415 hundred molecules for a range of chemical potentials. Ten thousand insertion and deletion attempts  
 1416 were made for salt pairs that had the same forcefield parameters as water. Only one perturbation  
 1417 step was used for the ideal NCMC insertion and deletion and the configuration of the system was  
 1418 not propagated during attempts. Figure 1 shows that there is excellent agreement between the  
 1419 relationship predicted by equation 60 and the simulation data.

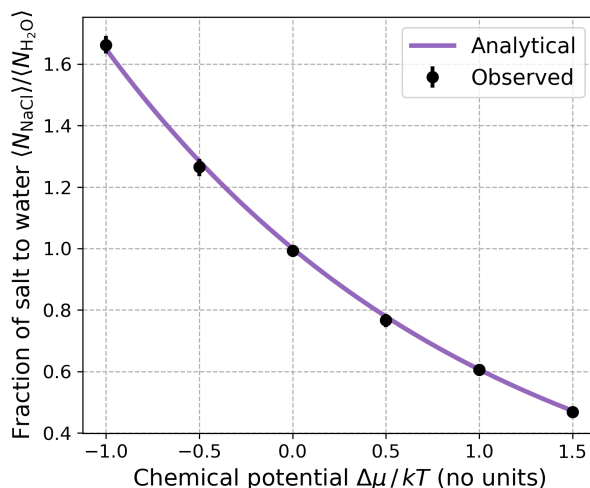

1420

1421

1422

1423

1424

1425

1426

1427

1428

1429

1430

**Appendix 4 Figure 1. Validating the osmostat by comparing the observed average salt-water fractions to analytical values for ideal mixing.**

The relationship between the chemical potential and fraction of average number of salt pairs to water molecules is known exactly for ideal mixing, and is given by equation 60. Ideal mixing was implemented for the osmostat by giving the ions the same forcefield parameters as water. For each simulation at a chemical potential, the equilibration time and statistical inefficiency for the average number of salt pairs  $\langle N_{\text{NaCl}} \rangle_{\Delta\mu, N, p, T}$  and water molecules  $\langle N_{\text{H}_2\text{O}} \rangle_{\Delta\mu, N, p, T}$  was determined using the timeseries module of pymbar<sup>75</sup>. The automatically determined equilibration times ranged from 361 and 723 insertion or deletion attempts. Effectively independent samples were extracted using the statistical inefficiency, and the means and 95% confidence intervals were estimated using bootstrap analysis.

1431

1432

1433

1434

1435

1436

1437

1438

It was also verified that the protocol work was effectively zero for the ideal NCMC transformations. While the protocol work should be exactly zero, the numerical imprecision of our implementation meant this could not always be achieved. The average protocol work for the transformations shown in Figure 1 (which were performed on a CPU Intel Core i7 with one perturbation step) was  $1 \times 10^{-7}$  kT with a maximum absolute value of  $8 \times 10^{-5}$  kT. The NCMC protocol used throughout this study has one thousand perturbation steps and ten propagation steps per perturbation. With this protocol, the average protocol work was estimated using one thousand attempts on a GTX1080 GPU to be  $2 \times 10^{-8}$  kT with a maximum absolute value of  $5 \times 10^{-4}$  kT.

1439 **Appendix 5**

1440

**Supplementary figures**

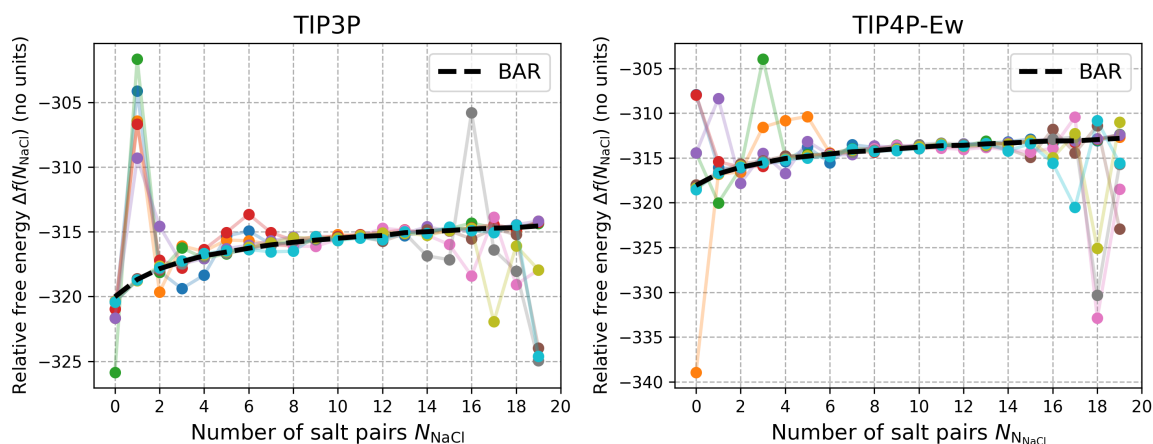

**Appendix 5 Figure 1. A Comparison of the salt insertion free energies as estimated by SAMS and BAR.** The individual SAMS estimates from ten repeats of the relative free energy  $\Delta f(N_{NaCl})$  to insert a  $Na^+$  and  $Cl^-$  and remove two water molecules in boxes of TIP3P (left) and TIP4P-Ew (right) for each SAMS simulations. Each color represents an estimate of  $\Delta f(N_{NaCl})$  from each repeat. The relative free energy as calculated by BAR using all the SAMS simulation data is shown for reference (dotted black line). Five of the SAMS repeats were started with the maximum of 20 salt pairs in the system, and the other five started with none. The significant variation between the individual SAMS repeats is due to the rapid accumulation of the biasing potential in the initial stages of the algorithm. This biased the sampling away from the initial states of the simulations and prevented the uniform sampling over the salt numbers.

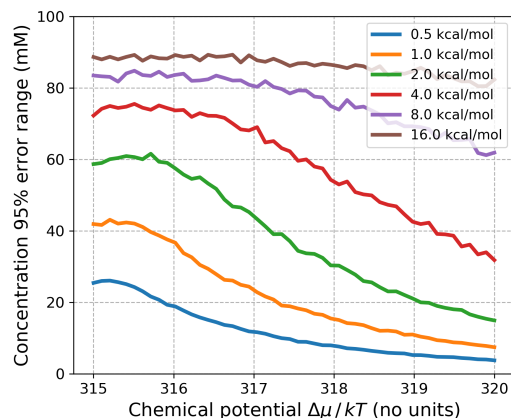

**Appendix 5 Figure 2. The statistical uncertainty of the predicted macroscopic concentration as a function of the chemical potential for different standard errors of the free energies  $f(N_{\text{NaCl}})$  in a box of 887 TIP3P water molecules.** Using the data from the SAMS calibration simulations, Gaussian noise, with a mean of zero, was added to each estimated free energy  $f(N_{\text{NaCl}})$   $N \in \{0, 1, \dots, 20\}$ , for a fixed values of  $\langle V \rangle_{N_{\text{NaCl}}}$ . Three thousand noisy sample of  $f(N_{\text{NaCl}})$   $N \in \{0, 1, \dots, 20\}$ , equation 19 were used to predict the macroscopic concentration for a range of chemical potentials. This figure shows the 95% confidence range of the resultant ensemble of concentrations for different standard deviations of the Gaussian noise about the free energies. One needs to evaluate the free energies  $f(N_{\text{NaCl}})$  to within 4 kcal/mol to achieve an error in the concentration that is no larger than roughly 80 mM. The tapering of the statistical error in the concentration at lower values of the chemical potential is due to maximum number of salt pairs used in the calibration (20), which limits that maximum concentration that can be predicted.

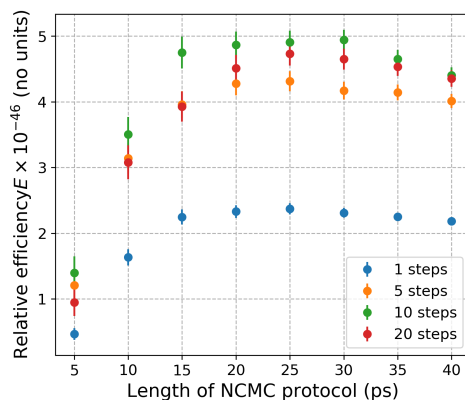

**Appendix 5 Figure 3. The relative efficiency of salt insertions/deletions in TIP3P water for different numbers of NCMC propagation steps between each perturbation step.** Due to the manner in which the nonbonded parameters are updated in the SaltSwap code, it is faster—for a fixed protocol time-length—to perform multiple propagation steps for each perturbation (i.e. update of the nonbonded parameters) during an NCMC insertion/deletion attempt. More propagation steps limit the amount of communication between the CPU and GPU. However, for a fixed total protocol time-length, fewer perturbations increases the thermodynamic length each perturbation must traverse, which decreases the mean acceptance rate of the attempts. Thus, there is a (code-dependent) trade-off in the sampling efficiency between the number of perturbations and propagations steps. This figure shows the efficiency, defined by equation 25, for different numbers of propagation steps at different protocol time-lengths relative to the efficiency of instantaneous insertions and deletions. Ten propagation steps per perturbation step achieve the highest efficiencies, and so were used in all production osmostat simulations.
